# Supplementary material
Source: publisher site journal article supplement (https://www.spandidos-publications.com/8127/downloadSupplementary)
Supplement: Supplementary file 1 [file downloadSupplementary]

## Sheet: Sheet1
Table SI. Summary of clinical studies comparing endoscopic nasopharyngectomy-based and radiotherapy-based strategies for nasopharyngeal carcinoma, including survival, late toxicity and quality-of-life outcomes.
Study (Author, Year)	Country/Center	Design	Modality	Stage (T/N)	Sample size (n)	Follow-up (median, months)	5-year OS (%) [95% CI]	10-year OS (%) [95% CI]	5-year DFS/PFS (%) [95% CI]	LRC/DMFS at 5 yr (%)	≥G3 late toxicity (%) (scale)	MDADI (baseline/last)	QLQ-H and N35 key domains	Adjuvant therapy	Notes / bias	(Refs.)
Liu et al, 2019	China, single-center	Retrospective; ENPG vs. IMRT reference cohort	ENPG vs. IMRT	Stage I (newly diagnosed)	ENPG 10; IMRT ref cohorts (survival 329; QoL 220)	59 (ENPG)	ENPG 100; IMRT 99.1	NR	ENPG 100; IMRT ~97-99 (LRFS 97.7; RRFS 99.0; DMFS 97.4)	ENPG: LRFS 100; RRFS 100; DMFS 100	Dry mouth ≥G3 0% ENPG vs 22.3% IMRT (distribution table)	NR	Swallowing 0.0 vs. 11.4; Dry mouth 3.3 vs. 34.4; Sticky saliva 3.3 vs. 32.6 (ENPG vs. IMRT)	None for ENPG; IMRT standard	Small ENPG sample; single-center; selection bias possible	(95)
Zhang et al, 2021	China, single-center	Retrospective comparative	ENPG + low-dose RT vs. IMRT	T1-T2 (newly diagnosed)	ENPG+LDRT 37; IMRT 132	54	97.3 vs. 97.7	NR	DMFS 97.3 vs. 90.2; LRFS 100 vs 95.5; RRFS 100 vs. 97.0	As left	Hearing loss 27.0% vs 53.8%; Xerostomia 24.3% vs 46.2%; Dysphagia 8.1% vs 25.8%	NR	Dry mouth 20.1±13.9 vs. 31.7±17.6; Swallowing and social domains better in ENPG+LDRT	Low-dose RT after ENPG	Non-randomized; potential confounding	(98)
Weng et al, 2020	China, single-center (PSM)	Propensity score-matched	Surgery + (C)RT vs. non-surgery (CRT/RT)	Early-stage NPC	58 vs 98 (after PSM)	NR	98.3 vs. 91.7	NR	DFS 98.3 vs. 81.4; RFS 100.0 vs. 90.1	NR	Severe oral mucositis 37.9% vs 54.1% (trend)	NR	NR	Yes (combined modality)	Observational; mixed modalities in surgery arm	(99)
Su et al, 2012	Taiwan, single-center	Retrospective cohort	IMRT alone	T1-T2b N0-N1	198	50.9 (12-104)	NR (DSS reported high; see paper)	NR	DMFS 97.8; LRFS 97.7 (T1/2a 100; T2b 94.2)	As left	Grade 3–4 xerostomia 0% at 24 mo; cranial nerve injury 0	NR	NR	None	Older IMRT era; toxicity window at 24 months	(100)
Wu et al, 2017	China, single-center	Retrospective; 10-year outcomes	IMRT (± chemo per stage)	Stage I-IV; stage-stratified outcomes	614	112.7 (7.6-156.8)	NR (focus on 10-year)	Stage I 100; Stage II 87.1; Stage III 75.5; Stage IV 55.6	NR	10-yr LRC by T: T1 94.2; T2 92.5; T3 91.4; T4 79.3	Late xerostomia 79.1%; hearing impairment 42.8% (any grade distribution noted)	NR	NR	As per institutional protocols	Not restricted to early-stage; used for 10-yr benchmarks	(101)
Niu et al, 2022	China, single-center	Retrospective	IMRT-based	T1-2N0-3 (early T, mixed N)	/	103	90.6	79.2	NR	5-/10-yr DMFS higher in N0-1 vs. N2-3 (for example, 97.9/95.7 vs. 80.1/77.5)	NR	NR	NR	Per stage	Mixed nodal stages; used to illustrate long-term trend in early T category	(102)
RT, radiotherapy; OS, overall survival; ENPG, endoscopic nasopharyngectomy; CTCAE, Common Terminology Criteria for Adverse Events; PROs, patient-reported outcomes; MDADI, MD Anderson Dysphagia Inventory; QLQ-H&N35, EORTC Quality of Life Questionnaire - Head and Neck 35; mo, months; T1-T2, tumor stage T1-T2; G3, grade 3.
